# Supplementary material for: By the numbers: ratings and utilization of behavioral health mobile applications
Source: PubMed Central journal article supplement (PMC6572775; doi:10.1038/s41746-019-0129-6), 2019-06-17
Supplement: 41746_2019_129_MOESM1_ESM.pdf [file 41746_2019_129_MOESM1_ESM.pdf]

Table S1: Ratings of the 25 Most Downloaded Behavioral Health Applications Across Three Expert Review Evaluation Frameworks

| Overall Download Rank* | App Name                     | Expert Review Evaluation Framework | Evaluation Category         |                                   |                                 |
|------------------------|------------------------------|------------------------------------|-----------------------------|-----------------------------------|---------------------------------|
|                        |                              |                                    | User Experience (UE)        | Credibility & Evidence Base (CEB) | Data Use & Security (DUS)       |
| 1                      | Peak – Brain Training        | MindTools.io                       | 3.2/5 (0.64) <sup>b</sup>   | Very Good <sup>a</sup>            | Transparent <sup>a</sup>        |
|                        |                              | PsyberGuide                        | 4.52/5 (0.90) <sup>a</sup>  | 2.86/5 (0.57) <sup>b</sup>        | Unacceptable <sup>c</sup>       |
|                        |                              | ORCHA**                            | 26/30 (0.87) <sup>a</sup>   | 28/40 (0.70) <sup>a</sup>         | 23.5/30 (0.78) <sup>a</sup>     |
| 2                      | Lumosity                     | MindTools.io                       | -                           | -                                 | -                               |
|                        |                              | PsyberGuide                        | 4.34/5 (0.87) <sup>a</sup>  | 3.21/5 (0.64) <sup>a</sup>        | Acceptable <sup>a</sup>         |
|                        |                              | ORCHA**                            | 26.2/30 (0.87) <sup>a</sup> | 35.5/40 (0.89) <sup>a</sup>       | 21.2/30 (0.71) <sup>a</sup>     |
| 3                      | Headspace                    | MindTools.io                       | 4.4/5 (0.88) <sup>a</sup>   | Very Good <sup>a</sup>            | Almost Transparent <sup>b</sup> |
|                        |                              | PsyberGuide                        | 4.74/5 (0.95) <sup>a</sup>  | 4.64/5 (0.93) <sup>a</sup>        | Questionable <sup>b</sup>       |
|                        |                              | ORCHA**                            | 21.2/25 (0.85) <sup>a</sup> | 34.9/45 (0.78) <sup>a</sup>       | 19/30 (0.63) <sup>b</sup>       |
| 4                      | Calm                         | MindTools.io                       | 3.5/5 (0.70) <sup>a</sup>   | Fair <sup>b</sup>                 | Almost Transparent <sup>b</sup> |
|                        |                              | PsyberGuide                        | 4.17/5 (0.83) <sup>a</sup>  | 2.85/5 (0.57) <sup>b</sup>        | Questionable <sup>b</sup>       |
|                        |                              | ORCHA**                            | 41.2/50 (0.82) <sup>a</sup> | -                                 | 31.4/50 (0.63) <sup>b</sup>     |
| 5                      | Relax Melodies: Sleep Sounds | MindTools.io                       | -                           | -                                 | -                               |
|                        |                              | PsyberGuide                        | -                           | -                                 | -                               |
|                        |                              | ORCHA**                            | 16.5/25 (0.66) <sup>a</sup> | 20.2/45 (0.45) <sup>b</sup>       | 20.6/30 (0.69) <sup>a</sup>     |
| 6                      | Fabulous - Self Care         | MindTools.io                       | -                           | -                                 | -                               |
|                        |                              | PsyberGuide                        | -                           | 1.43/5 (0.29) <sup>c</sup>        | Unacceptable <sup>c</sup>       |
|                        |                              | ORCHA**                            | 33.1/50 (0.66) <sup>a</sup> | -                                 | 21.5/50 (0.43) <sup>c</sup>     |
| 7                      | Daylio                       | MindTools.io                       | 4/5 (0.80) <sup>a</sup>     | Fair <sup>b</sup>                 | Almost Transparent <sup>b</sup> |
|                        |                              | PsyberGuide                        | 4.14/5 (0.83) <sup>a</sup>  | 2.10/5 (0.42) <sup>c</sup>        | Questionable <sup>b</sup>       |
|                        |                              | ORCHA**                            | 40.5/50 (0.81) <sup>a</sup> | -                                 | 37.2/50 (0.74) <sup>a</sup>     |
| 8                      | Insight Timer                | MindTools.io                       | 3.3/5 (0.66) <sup>b</sup>   | Good <sup>b</sup>                 | Not Transparent <sup>c</sup>    |
|                        |                              | PsyberGuide                        | 4.73/5 (0.95) <sup>a</sup>  | 2.50/5 (0.50) <sup>b</sup>        | Unacceptable <sup>c</sup>       |
|                        |                              | ORCHA**                            | 43.7/50 (0.87) <sup>a</sup> | -                                 | 27.3/50 (0.55) <sup>b</sup>     |
| 9                      | Stop, Breathe and Think      | MindTools.io                       | 3.4/5 (0.68) <sup>b</sup>   | Fair <sup>b</sup>                 | Almost Transparent <sup>b</sup> |
|                        |                              | PsyberGuide                        | 4.75/5 (0.95) <sup>a</sup>  | 2.50/5 (0.50) <sup>b</sup>        | Unacceptable <sup>c</sup>       |
|                        |                              | ORCHA**                            | 20.2/25 (0.81) <sup>a</sup> | 28.7/45 (0.64) <sup>b</sup>       | 16.1/30 (0.54) <sup>b</sup>     |
| 10                     | Pacifica                     | MindTools.io                       | 3.3/5 (0.66) <sup>b</sup>   | Fair <sup>b</sup>                 | Almost Transparent <sup>b</sup> |
|                        |                              | PsyberGuide                        | 4.70/5 (0.94) <sup>a</sup>  | 2.85/5 (0.57) <sup>b</sup>        | Acceptable <sup>a</sup>         |
|                        |                              | ORCHA**                            | 17.6/20 (0.88) <sup>a</sup> | 30.6/50 (0.61) <sup>b</sup>       | 25.1/30 (0.84) <sup>a</sup>     |
| 11                     | Simple Habit – Meditation    | MindTools.io                       | -                           | -                                 | -                               |
|                        |                              | PsyberGuide                        | 3.51/5 (0.70) <sup>b</sup>  | 2.50/5 (0.50) <sup>b</sup>        | Acceptable <sup>a</sup>         |
|                        |                              | ORCHA**                            | 41.7/50 (0.83) <sup>a</sup> | -                                 | 31/50 (0.62) <sup>b</sup>       |
| 12                     | Happify                      | MindTools.io                       | -                           | -                                 | -                               |
|                        |                              | PsyberGuide                        | 3.34/5 (0.67) <sup>c</sup>  | 3.92/5 (0.78) <sup>a</sup>        | Questionable <sup>b</sup>       |
|                        |                              | ORCHA**                            | 22/25 (0.88) <sup>a</sup>   | 36.5/45 (0.81) <sup>a</sup>       | 23.8/30 (0.79) <sup>a</sup>     |
| 13                     | 7 Cups: Anxiety &            | MindTools.io                       | 3.8/5 (0.76) <sup>a</sup>   | Fair <sup>b</sup>                 | Almost Transparent <sup>b</sup> |

|    |                                               |              |                             |                             |                                         |
|----|-----------------------------------------------|--------------|-----------------------------|-----------------------------|-----------------------------------------|
|    | Stress Chat                                   | PsyberGuide  | -                           | -                           | -                                       |
|    |                                               | ORCHA**      | 18.1/20 (0.91) <sup>a</sup> | 45/50 (0.90) <sup>a</sup>   | 19.6/30 (0.65) <sup>a</sup>             |
| 14 | Breathe - Sleep & Meditation                  | MindTools.io | -                           | -                           | -                                       |
|    |                                               | PsyberGuide  | -                           | -                           | -                                       |
|    |                                               | ORCHA**      | 32.3/50 (0.65) <sup>b</sup> | -                           | 24.8/50 (0.50) <sup>b</sup>             |
| 15 | Smiling Mind                                  | MindTools.io | 3.1/5 (0.62) <sup>b</sup>   | Good <sup>b</sup>           | Almost Transparent <sup>b</sup>         |
|    |                                               | PsyberGuide  | 4.00/5 (0.80) <sup>a</sup>  | 2.85/5 (0.57) <sup>b</sup>  | Unacceptable <sup>c</sup>               |
|    |                                               | ORCHA**      | 23.8/30 (0.79) <sup>a</sup> | 22.2/40 (0.56) <sup>b</sup> | 15.6/30 (0.52) <sup>b</sup>             |
| 16 | The Mindfulness App                           | MindTools.io | -                           | -                           | -                                       |
|    |                                               | PsyberGuide  | 3.30/5 (0.66) <sup>c</sup>  | 2.85/5 (0.57) <sup>b</sup>  | -                                       |
|    |                                               | ORCHA**      | 16.2/25 (0.65) <sup>b</sup> | 24.2/45 (0.54) <sup>b</sup> | 15.1/30 (0.50) <sup>b</sup>             |
| 17 | Aura: Calm Anxiety & Sleep                    | MindTools.io | -                           | -                           | -                                       |
|    |                                               | PsyberGuide  | -                           | 2.86/5 (0.57) <sup>b</sup>  | Unacceptable <sup>c</sup>               |
|    |                                               | ORCHA**      | -                           | -                           | -                                       |
| 18 | 21-Day Meditation Experience                  | MindTools.io | -                           | -                           | -                                       |
|    |                                               | PsyberGuide  | 3.13/5 (0.63) <sup>c</sup>  | 2.85/5 (0.57) <sup>b</sup>  | Questionable <sup>b</sup>               |
|    |                                               | ORCHA**      | -                           | -                           | -                                       |
| 19 | Digipill: Guided Meditation                   | MindTools.io | -                           | -                           | -                                       |
|    |                                               | PsyberGuide  | -                           | -                           | -                                       |
|    |                                               | ORCHA**      | 19.6/25 (0.78) <sup>a</sup> | 32.9/45 (0.73) <sup>a</sup> | 14.4/30 (0.48) <sup>b</sup>             |
| 20 | Self-Help for Anxiety Management              | MindTools.io | 2.7/5 (0.54) <sup>c</sup>   | Fair <sup>b</sup>           | Not Transparent <sup>c</sup>            |
|    |                                               | PsyberGuide  | 4.10/5 (0.82) <sup>a</sup>  | 2.50/5 (0.50) <sup>b</sup>  | Questionable <sup>b</sup>               |
|    |                                               | ORCHA**      | 42.8/50 (0.86) <sup>a</sup> | -                           | 35.3/50 (0.71) <sup>a</sup>             |
| 21 | Take a Break! - Meditations for Stress Relief | MindTools.io | -                           | -                           | -                                       |
|    |                                               | PsyberGuide  | -                           | -                           | -                                       |
|    |                                               | ORCHA**      | 29.5/50 (0.59) <sup>b</sup> | -                           | Numeric value not provided <sup>a</sup> |
| 22 | Talkspace                                     | MindTools.io | 4.2/5 (0.84) <sup>a</sup>   | Good <sup>b</sup>           | Almost Transparent <sup>b</sup>         |
|    |                                               | PsyberGuide  | 3.57/5 (0.71) <sup>b</sup>  | 3.57/5 (0.71) <sup>a</sup>  | Acceptable <sup>a</sup>                 |
|    |                                               | ORCHA**      | 16.8/20 (0.84) <sup>a</sup> | 31.2/50 (0.62) <sup>b</sup> | 19.3/30 (0.64) <sup>b</sup>             |
| 23 | Omvana – Meditation for Everyone              | MindTools.io | 2.5/5 (0.50) <sup>c</sup>   | Fair <sup>b</sup>           | Not Transparent <sup>c</sup>            |
|    |                                               | PsyberGuide  | -                           | -                           | -                                       |
|    |                                               | ORCHA**      | 30.8/50 (0.62) <sup>b</sup> | -                           | 22/50 (0.44) <sup>c</sup>               |
| 24 | Breathe2Relax                                 | MindTools.io | 2.5/5 (0.50) <sup>c</sup>   | Good <sup>b</sup>           | Not Transparent <sup>c</sup>            |
|    |                                               | PsyberGuide  | 3.98/5 (0.80) <sup>a</sup>  | 2.85/5 (0.57) <sup>b</sup>  | -                                       |
|    |                                               | ORCHA**      | 39.2/50 (0.78) <sup>a</sup> | -                           | 13.2/50 (0.26) <sup>c</sup>             |
| 25 | Calm Harm                                     | MindTools.io | 3.4/5 (0.68) <sup>b</sup>   | Fair <sup>b</sup>           | Almost Transparent <sup>b</sup>         |
|    |                                               | PsyberGuide  | 4.28/5 (0.86) <sup>a</sup>  | 2.86/5 (0.57) <sup>b</sup>  | Questionable <sup>b</sup>               |
|    |                                               | ORCHA**      | 12.6/20 (0.63) <sup>b</sup> | 23.5/50 (0.47) <sup>b</sup> | 16.2/30 (0.54) <sup>b</sup>             |

a: top-tercile rating; b: middle-tercile rating; c: bottom-tercile rating

\*Total Download Rank was based on sum of Apple App Store (iOS) and Google Play Store (Android) total global downloads since first tracked. Of note, the duration of time tracked by PrioriData varied across individual apps and marketplaces. The same app was often tracked over different periods of time on the Apple and Google Play App Stores.

\*\*ORCHA - Organization for the Review of Care and Health Applications
